# Supplementary material for: Hybrids based on transition metal phosphide (Mn2P, Co2P, Ni2P) nanoparticles and heteroatom-doped carbon nanotubes for efficient oxygen reduction reaction
Source: Royal Society of Chemistry journal article supplement (doi:10.1039/c5ra21385a), 2015-01-01
Supplement: c5ra21385a1.pdf [file c5ra21385a1.pdf]

Electronic Supplementary Information of

**Hybrids based on transition metal phosphide (Mn<sub>2</sub>P, Co<sub>2</sub>P, Ni<sub>2</sub>P) nanoparticles and heteroatom-doped carbon nanotubes for efficient oxygen reduction reaction**

Kuiyong Chen,<sup>a,b</sup> Xiaobin Huang,<sup>a\*</sup> Chaoying Wan,<sup>c</sup> and Hong Liu<sup>a</sup>

<sup>a</sup> *School of Aeronautics and Astronautics, Shanghai Jiao Tong University, 800 Dongchuan Road, Shanghai, 200240, P R China.*

<sup>b</sup> *School of Materials Science and Engineering, Shanghai Jiao Tong University, 800 Dongchuan Road, Shanghai, 200240, P R China.*

<sup>c</sup> *International Institute for Nanocomposites Manufacturing, WMG, University of Warwick, Coventry, UK, CV4 7AL*

\*Corresponding author. Fax: +86-21-54741297; Tel: +86-21-54743264; E-mail address: [xbhuang@sjtu.edu.cn](mailto:xbhuang@sjtu.edu.cn).

**Koutechy\_Levich equation:**

$$\frac{1}{J} = \frac{1}{J_K} + \frac{1}{B\omega^{0.5}} \quad (i)$$

$J_k$  represents the kinetic current and  $\omega$  is the electrode rotating rate (rpm).

$$B = 0.2nF(D_{O_2})^{3/2}\nu^{-1/6}C_{O_2} \quad (ii)$$

B could be determined from the slope of K-L plots by equation (i), F is the Faraday constant ( $F = 96485 \text{ C/mol}$ ),  $D_{O_2}$  represents the diffusion coefficient of  $O_2$  in 0.1 M KOH ( $1.9 \times 10^{-5} \text{ cm}^2/\text{s}$ ),  $\nu$  is the kinetic viscosity ( $0.01 \text{ cm}^2/\text{s}$ ), and  $C_{O_2}$  represents the bulk concentration of  $O_2$  ( $1.2 \times 10^{-6} \text{ mol/cm}^3$ ). n is the transferred electron transfer number per oxygen molecule, and could be calculated via equation (i) and (ii).

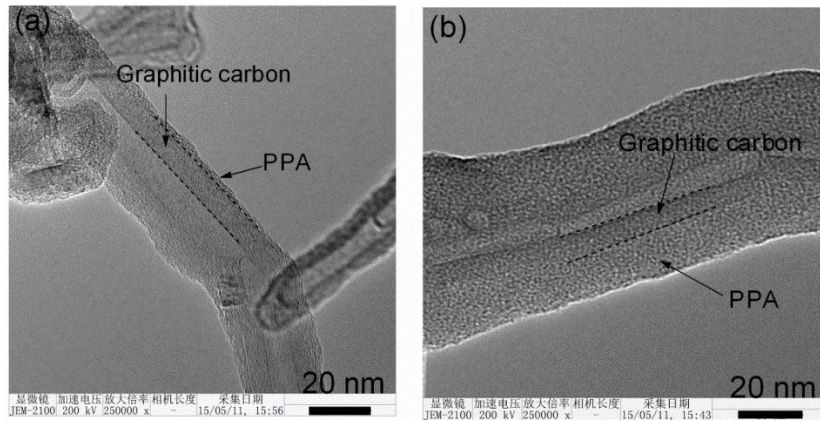

**Fig. S1**TEM images of CNTs@PPA with different PPA contents. (a)  $m_{\text{CNTs}}: m_{\text{HCCP}}: m_{\text{P-PDA}}=4:1:1$ , (b)  $m_{\text{CNTs}}: m_{\text{HCCP}}: m_{\text{P-PDA}}=1:1:1$

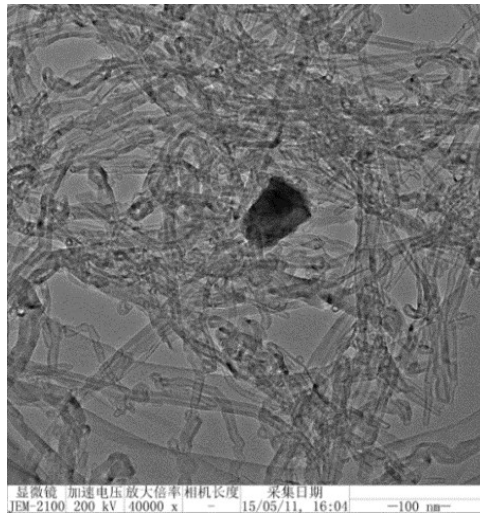

**Fig. S2** TEM images of pristine MWCNTs load with cobalt compound carbonized at 900 °C.

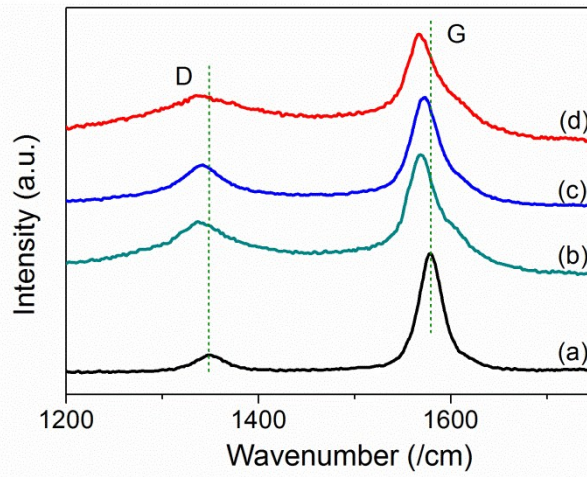

**Fig. S3** Raman spectra of (a) HCNTs, (b) HCNTs-Co<sub>2</sub>P, (c) HCNTs-Mn<sub>2</sub>P and (d) HCNTs-Ni<sub>2</sub>P

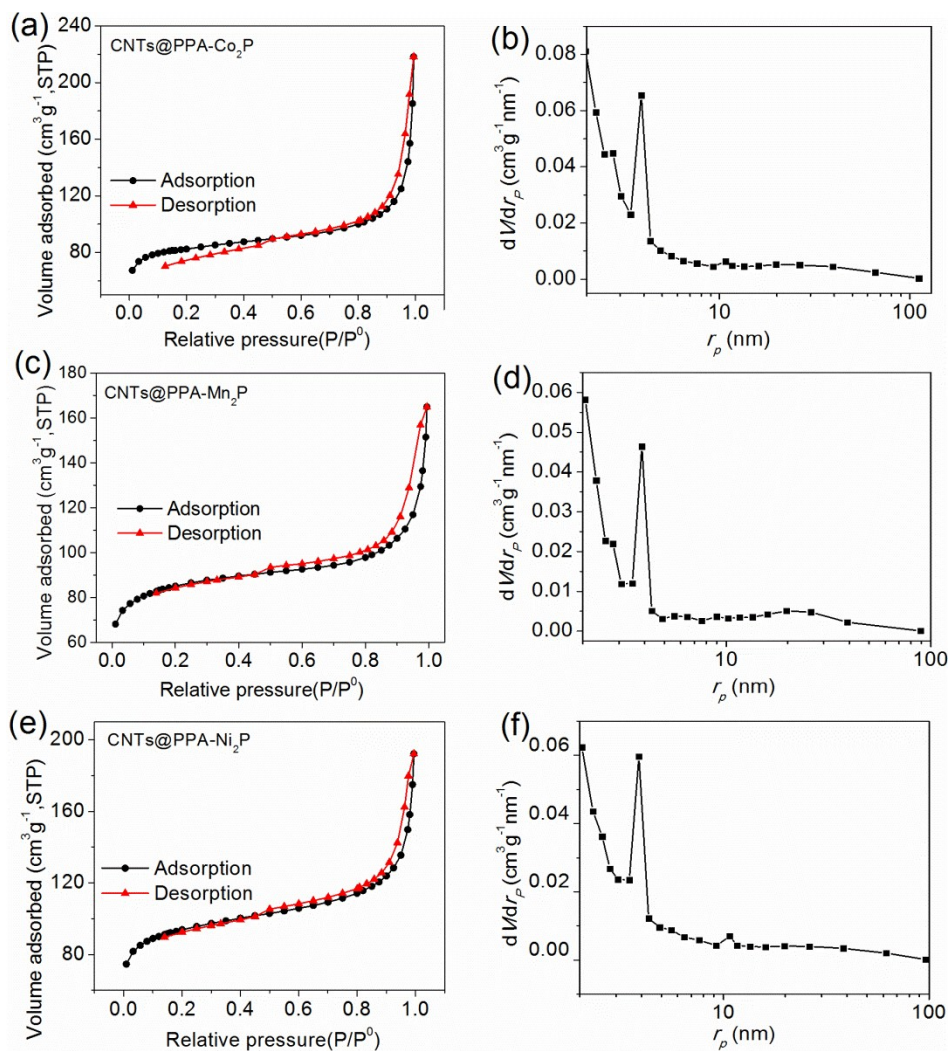

**Fig. S4** Nitrogen adsorption–desorption isotherms of HCNTs-Co<sub>2</sub>P(a), HCNTs-Mn<sub>2</sub>P (c) and HCNTs-Ni<sub>2</sub>P (e), and their corresponding pore size distribution (b, d, f)

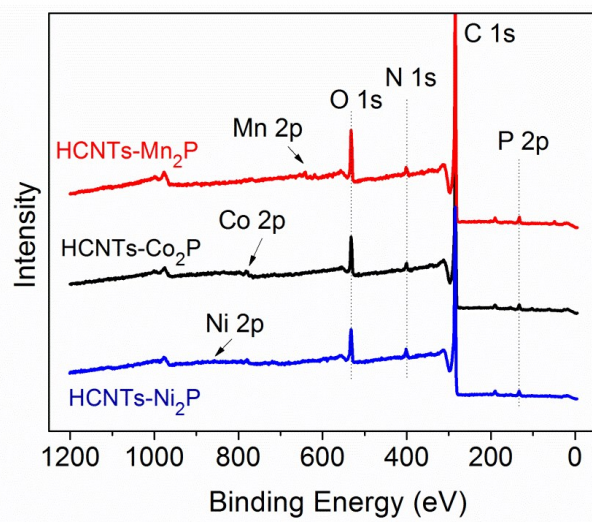

Fig. S5 Wide survey XPS spectra of the samples

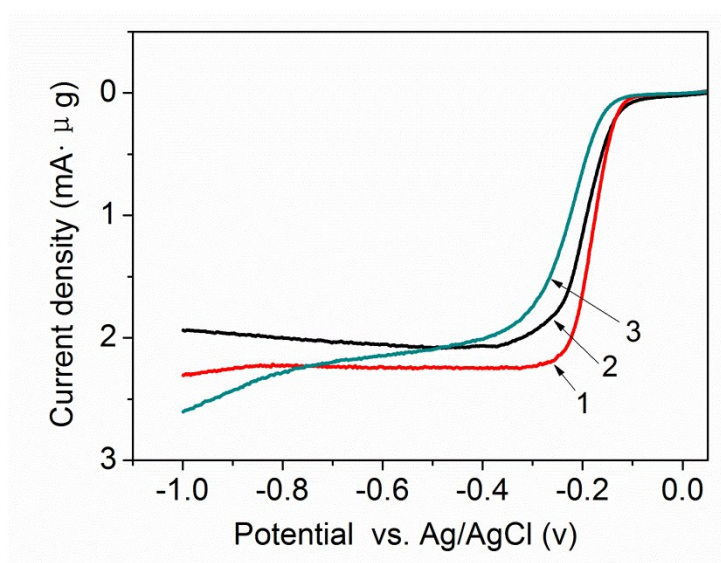

**Fig. S6** Metal-mass-specific linear sweep voltammograms of HCNTs-Co<sub>2</sub>P (1), HCNTs-Mn<sub>2</sub>P (2), HCNTs-Ni<sub>2</sub>P (3) at a rotation rate of 1800 rpm in O<sub>2</sub>-saturated 0.1 M KOH solution. The metal mass was estimated based on the XPS results.

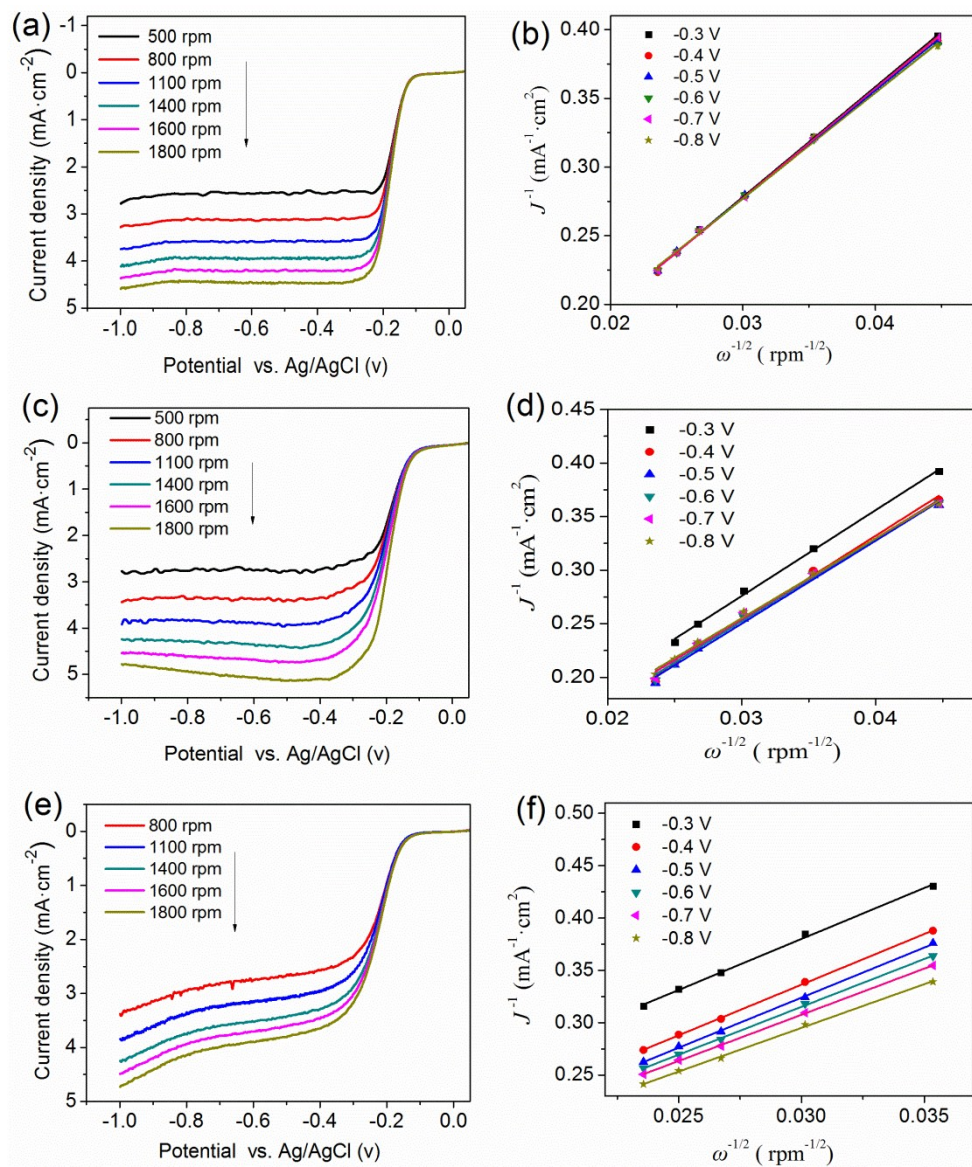

**Fig. S7** Linear sweep voltammograms (LSVs) curves of HCNTs-Co<sub>2</sub>P (a), HCNTs-Mn<sub>2</sub>P (c) and HCNTs-Ni<sub>2</sub>P (e) at various rotating rates in O<sub>2</sub> saturated 0.1 M KOH and the corresponding Koutecky-Levich plots recorded at selected potentials (b, d, f)

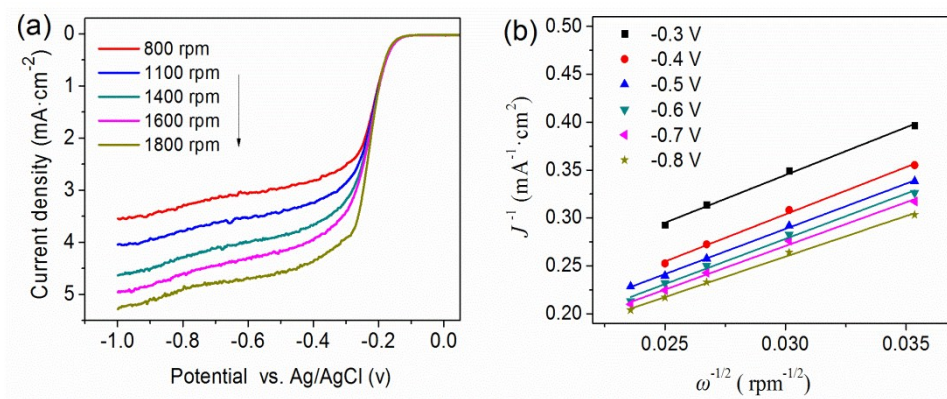

**Fig. S8** (a) LSVs curves of HCNTs at various rotating rates in O<sub>2</sub> saturated 0.1 M KOH and (b) the corresponding Koutecky-Levich plots recorded at selected potentials
